# Supplementary material
Source: publisher figshare collection journal article supplement (https://acs.figshare.com/ndownloader/files/4275616)
Supplement: Supplementary file 1 [file 4275616]

**Electronic Supplementary Information for:**

**Dendritic MRI Contrast Agents: An Efficient Pre-labeling Approach Based on CuAAC**

Francisco Fernández-Trillo,<sup>a</sup> Jesús Pacheco-Torres,<sup>b</sup> Juan Correa,<sup>a</sup> Paloma Ballesteros,<sup>c</sup> Pilar Lopez-Larrubia,<sup>b</sup> Sebastián Cerdán,<sup>b</sup> Ricardo Riguera,<sup>a\*</sup> and Eduardo Fernandez-Megia<sup>a\*</sup>

<sup>a</sup>Department of Organic Chemistry and Center for Research in Biological Chemistry and Molecular Materials (CIQUS), University of Santiago de Compostela, Jenaro de la Fuente s/n, 15782 Santiago de Compostela, Spain

<sup>b</sup>Instituto de Investigaciones Biomédicas “Alberto Sols”, CSIC, Arturo Duperier 4, 28029, Madrid, Spain

<sup>c</sup>Instituto Universitario de Investigación - UNED, Madrid, Spain

## Synthesis of Alk-DO3A-Gd

A modified procedure for the preparation of Alk-DO3A-Gd was adapted so that higher yields for the first intermediate (**1**) could be achieved without the need of chromatographic purifications in any of the steps.<sup>1,2</sup> The purity of the compounds was confirmed by analytical HPLC/MS, while spectroscopic data was identical to that of the reported compounds.

Analytical HPLC was run using a Waters Spherisorb OSD2 LiChrospher 100 RP-18 ( $\Phi$  10 mm, L 250 mm, 0.5  $\mu$ m particle size). A gradient of H<sub>2</sub>O/CH<sub>3</sub>CN (TFA 0.1%) from 0% H<sub>2</sub>O (5 min) to 75% H<sub>2</sub>O in 30 min was employed. ESI-MS was performed by using an Agilent 1100 series LC/MSD model in positive scan mode with direct injection of purified compounds.

- {4,10-Bis-tert-butoxycarbonylmethyl-7-[(2-propynylcarbamoyl)-methyl]-1,4,7,10-tetraaza-cyclododec-1-yl}-acetic acid tert-butyl ester (**1**)

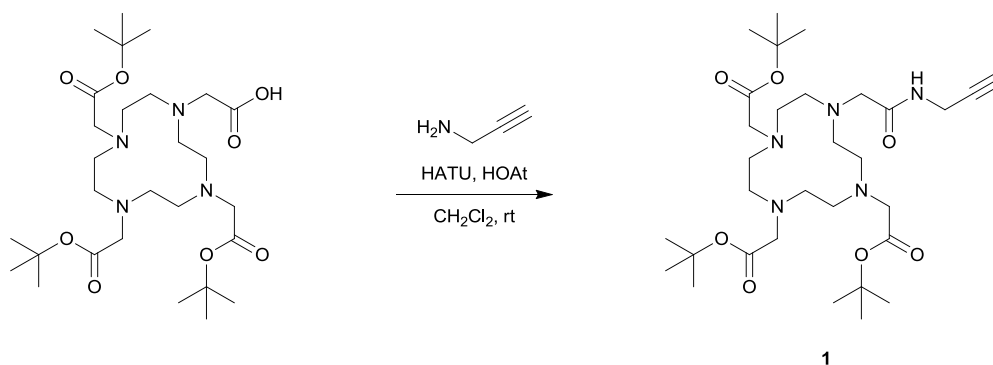

**Scheme S1**

To a suspension of (tBuO)<sub>3</sub>-DOTA-OH (390 mg, 0.68 mmol), HATU (297 mg, 0.77 mmol) and HOAt (109 mg, 0.80 mmol) in CH<sub>2</sub>Cl<sub>2</sub> (4 mL) was added propargyl amine (70  $\mu$ L, 60 mg, 1.07 mmol) and the mixture was left to stir overnight. The crude was diluted with CHCl<sub>3</sub> (16 mL) and washed with H<sub>2</sub>O (4 x). The organic phase was concentrated, diluted with EtOAc (20 mL), and washed with H<sub>2</sub>O (4 x). The organic phase was concentrated to give 394 mg (95%) of **1** as an off-white solid. <sup>1</sup>H NMR (300 MHz, CDCl<sub>3</sub>, 60°C)  $\delta$  4.04 (dd,  $J$  = 5.3, 2.5 Hz, 2H, CH<sub>2</sub>-C $\equiv$ C), 3.89–3.75 (br s, 2H, CH<sub>2</sub>), 3.62 (s, 2H, CH<sub>2</sub>-C=O), 3.42 (s, 4H, CH<sub>2</sub>-C=O), 3.22 (br s, 4H, CH<sub>2</sub>), 3.08–2.96 (m, 6H, CH<sub>2</sub>), 2.96–2.89 (m, 6H, CH<sub>2</sub>), 2.19 (t,  $J$  = 2.5 Hz, 1H,  $\equiv$ CH), 1.49 (s, 27H, CH<sub>3</sub>). ESI-MS:  $m/z$  610.42 (MH<sup>+</sup>, 100%), 632.40 (MNa<sup>+</sup>, 80). HR-MS Calcd for C<sub>31</sub>H<sub>56</sub>N<sub>5</sub>O<sub>7</sub><sup>+</sup> (MH<sup>+</sup>): 610.4174, found: 610.4170.

- {4,10-Bis-carboxymethyl-7-[(2-propynylcarbamoyl)-methyl]-1,4,7,10-tetraaza-cyclododec-1-yl}-acetic acid (**2**)

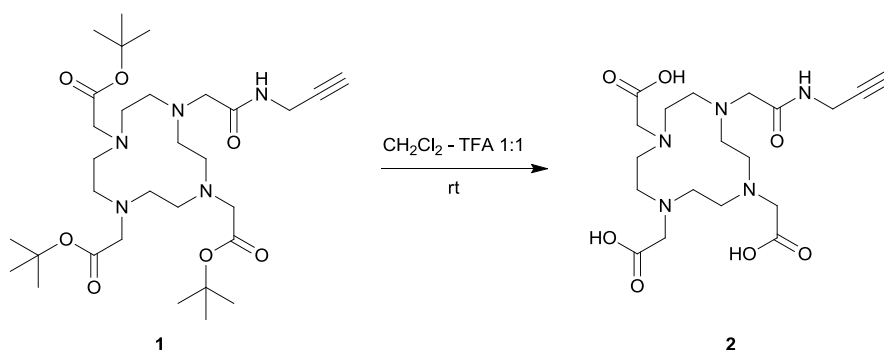

**Scheme S2**

Following the procedure reported by Finn and coworkers,<sup>2</sup> from 385 mg (0.63 mmol) of **1**, 273 mg (98%) of **2** were isolated as an off-white solid. <sup>1</sup>H-NMR (300 MHz, D<sub>2</sub>O, 80°C) δ 3.89 (d, *J* = 2.3 Hz, 2H, CH<sub>2</sub>-C≡C), 3.71 (s, 4H, CH<sub>2</sub>-C=O), 3.67–3.58 (m, 4H, CH<sub>2</sub>-C=O), 3.28–3.18 (m, 8H, CH<sub>2</sub>), 3.19–3.07 (m, 8H, CH<sub>2</sub>), 2.53 (t, *J* = 2.3 Hz, 1H, ≡CH). ESI-MS: *m/z* 442.23 (MH<sup>+</sup>, 100%), 464.21 (MNa<sup>+</sup>, 12), 480.18 (MK<sup>+</sup>, 13). HR-MS Calcd for C<sub>19</sub>H<sub>32</sub>N<sub>5</sub>O<sub>7</sub><sup>+</sup> (MH<sup>+</sup>): 442.2296, found: 442.2302.

- {4,10-Bis-carboxymethyl-7-[(2-propynylcarbamoyl)-methyl]-1,4,7,10-tetraaza-cyclododec-1-yl}-acetate gadolinium (III) complex (Alk-DO3A-Gd)

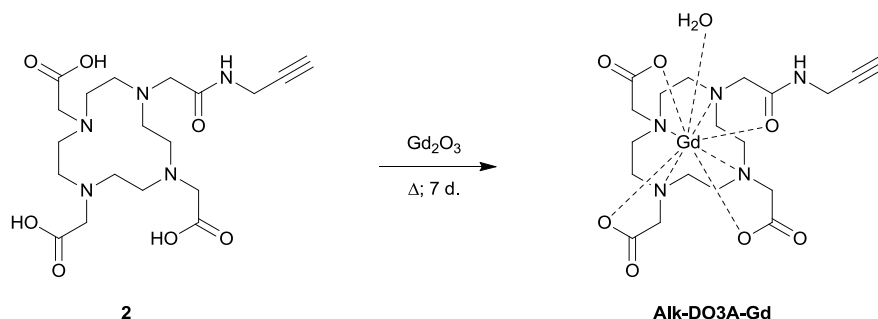

**Scheme S3**

Following the procedure reported by Finn and coworkers,<sup>2</sup> from 90 mg (0.2 mmol) of **2**, 113 mg (100%) of Alk-DO3A-Gd were isolated as an off-white solid. ESI-MS: *m/z* 594.13 (40), 595.13 (74), 596.13 (68), 596.63 (6), 597.13 (MH<sup>+</sup>, 100), 598.13 (19), 599.13 (70), 600.14 (10); HR-MS Calcd for C<sub>19</sub>H<sub>29</sub>GdN<sub>5</sub>O<sub>7</sub><sup>+</sup> [MH]<sup>+</sup>: 597.1308, found: 597.1316.

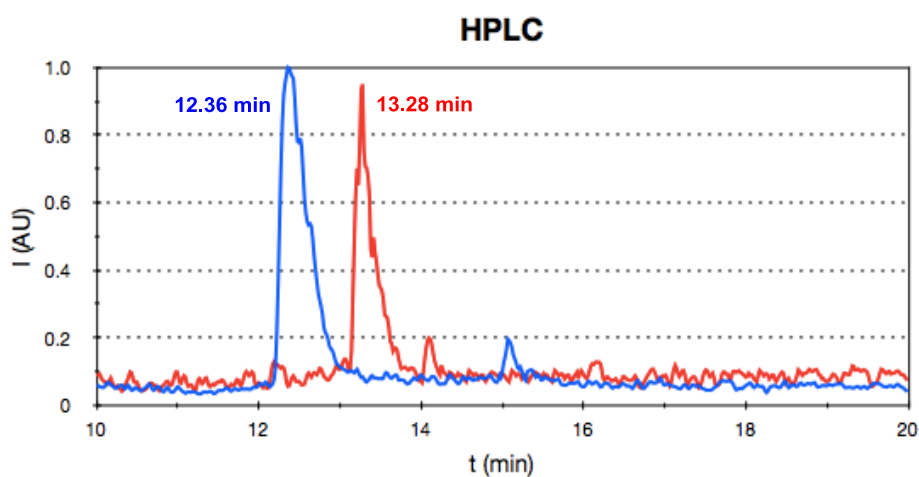

**Figure S1:** Normalized HPLC elugrams of **2** (blue) and Alk-DO3A-Gd (red).

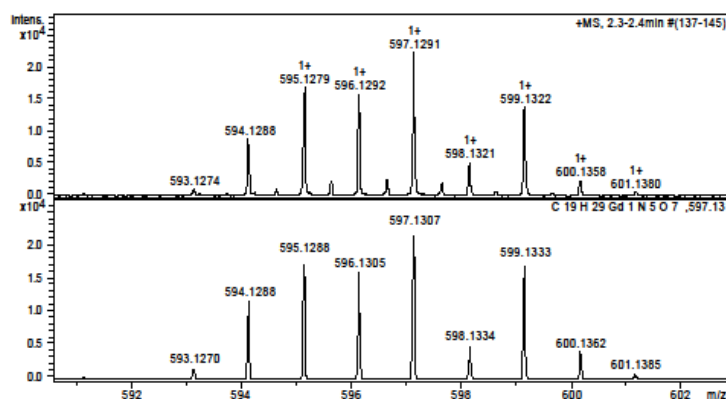

**Figure S2:** Calculated and found ESI-MS for Alk-DO3A-Gd showing the characteristic Gd isotopic pattern.

## Characterization of PEG-[Gn]-(DO3A-Gd)

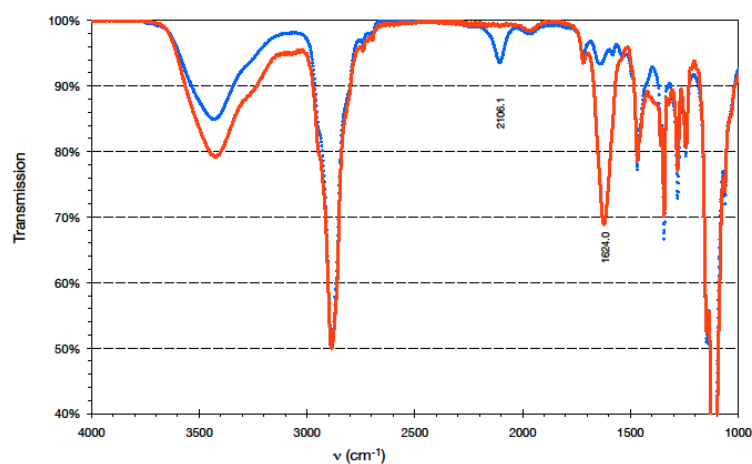

**Figure S3:** IR spectra of PEG-[G1]-N<sub>3</sub> (blue) and PEG-[G1]-(DO3A-Gd) (red) showing the complete disappearance of the azide signal (2106 cm<sup>-1</sup>) and appearance of a carbonyl stretch band (1624 cm<sup>-1</sup>).

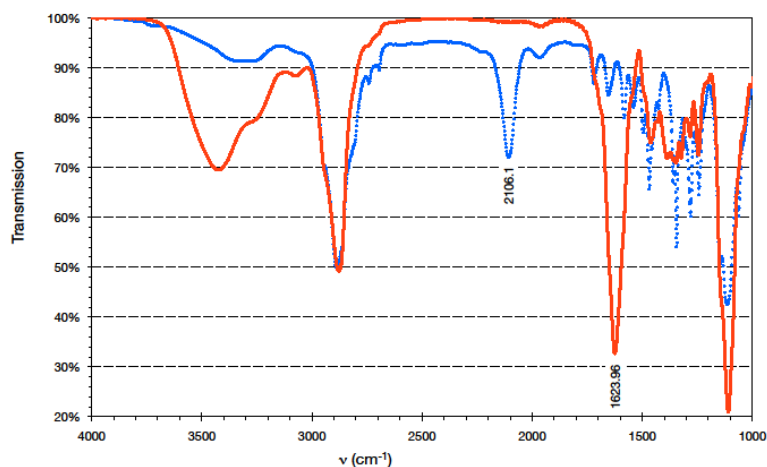

**Figure S4:** IR spectra of PEG-[G2]-N<sub>3</sub> (blue) and PEG-[G2]-(DO3A-Gd) (red) showing the complete disappearance of the azide signal (2106 cm<sup>-1</sup>) and appearance of a carbonyl stretch band (1624 cm<sup>-1</sup>).

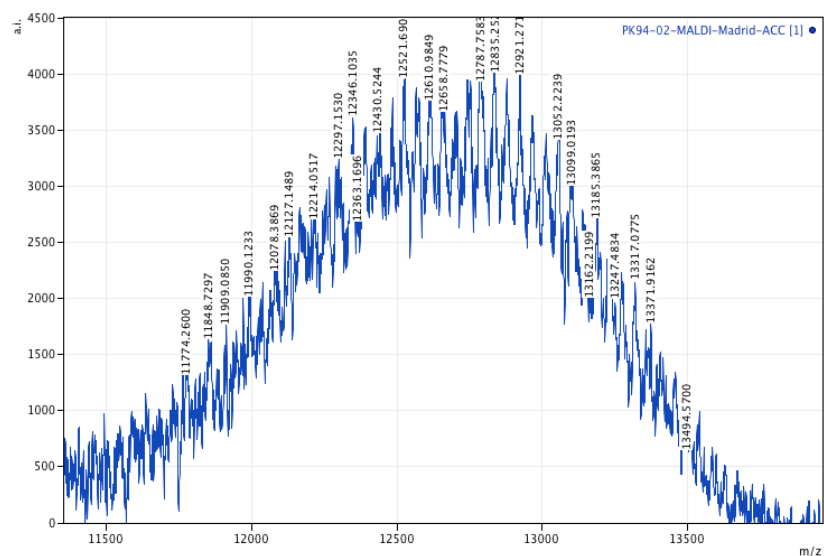

**Figure S5:** MALDI-TOF spectrum of PEG-[G2]-(DO3A-Gd).

## Cytotoxicity tests

The viability of C6 glioma cells was determined by using the classical 3-(4,5-dimethylthiazol-2-yl)-2,5-diphenyltetrazolium bromide (MTT) method (Sigma Aldrich MTT kit TOX-1).<sup>3</sup> Briefly,  $10^4$  cells/well were seeded into 96-well plates in 100  $\mu$ L complete medium and incubated at 37 °C in 5% CO<sub>2</sub> atmosphere. After 24 h, the medium was replaced with a fresh one containing the dendrimers at different concentrations. After a 24 h incubation period, 20  $\mu$ L of MTT (15 mg/vial in serum) was added to each well. After 4 h of incubation at 37 °C and 5% CO<sub>2</sub>, the medium was removed, formazan crystals were solubilized with 100  $\mu$ L of MTT solubilization solution (10% Triton X-100 plus 0.1N HCl in anhydrous isopropanol) and the solution was gently mixed to dissolve the reacted dye. The absorbance of each well was read on a microplate reader (Dynatech MR7000 instruments) at 570 nm. The spectrophotometer was calibrated to zero absorbance using culture medium without cells. The relative cell viability (%) related to control wells containing cell culture medium without dendrimers was calculated by  $[A]_{\text{test}}/[A]_{\text{control}} \times 100$ .

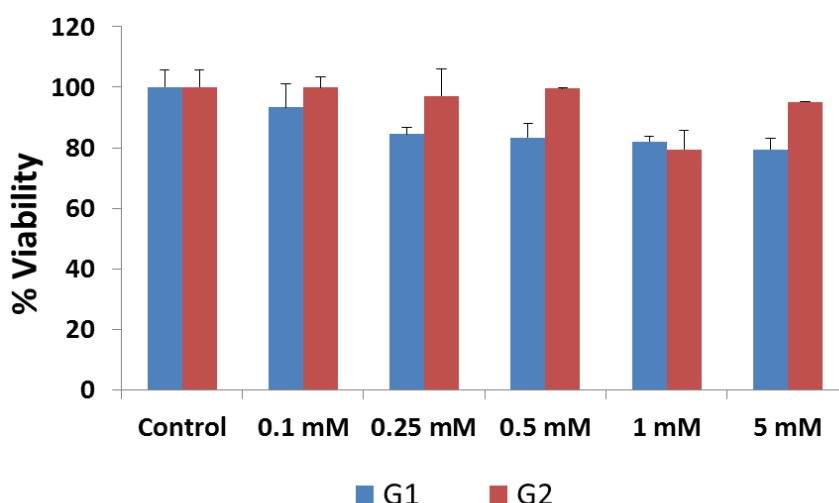

**Figure S6:** Evaluation of cytotoxicity of PEG-[G1]-(DO3A-Gd) and PEG-[G2]-(DO3A-Gd) on C6 glioma cells relative to Gd concentration.

## Magnetic Resonance studies

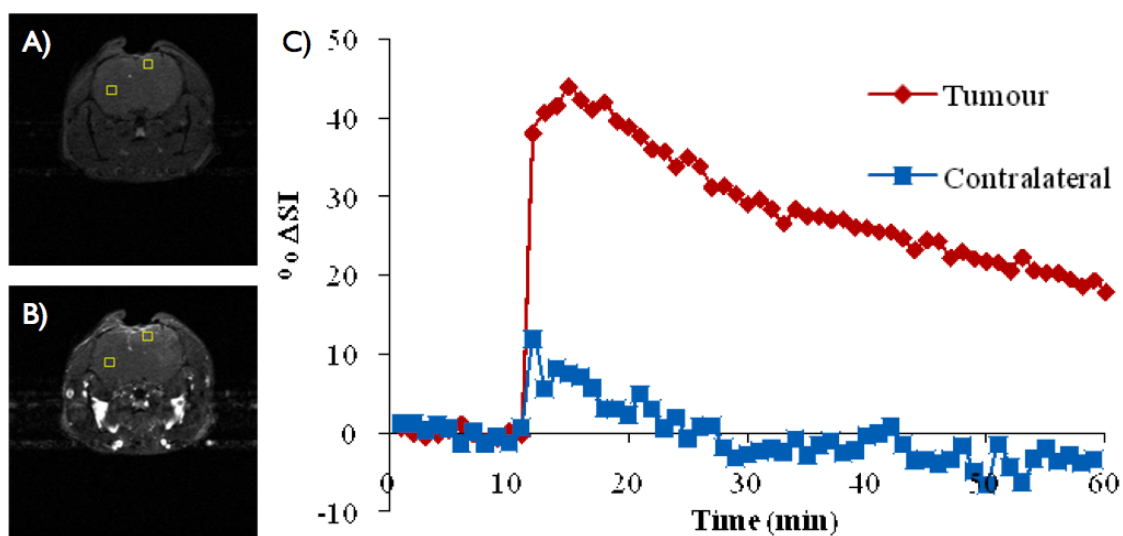

**Figure S7:**  $T_1$ -weighted images of a mouse brain before **A)** and immediately after **B)** the administration of PEG-[G1]-(DO3A-Gd). Right and left squares show the tumor and contralateral hemisphere ROI analyzed. **C)** Normalized  $\Delta SI$  in tumor (red) and in contralateral hemisphere (blue).

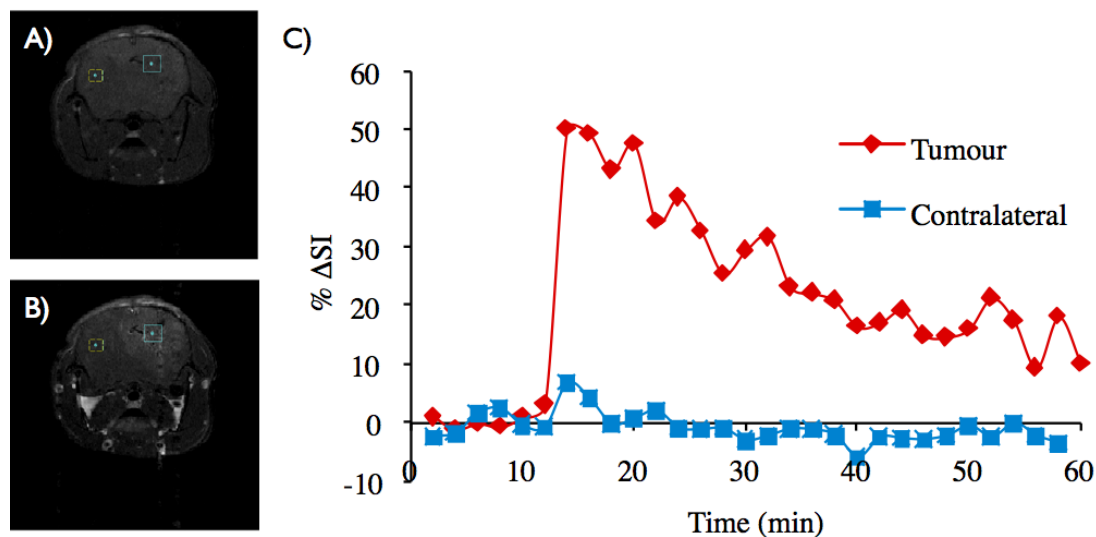

**Figure S8:**  $T_1$ -weighted images of a mouse brain before **A)** and immediately after **B)** the administration of PEG-[G2]-(DO3A-Gd). Right and left squares show the tumor and contralateral hemisphere ROI analyzed. **C)** Normalized  $\Delta SI$  in tumor (red) and in contralateral hemisphere (blue).

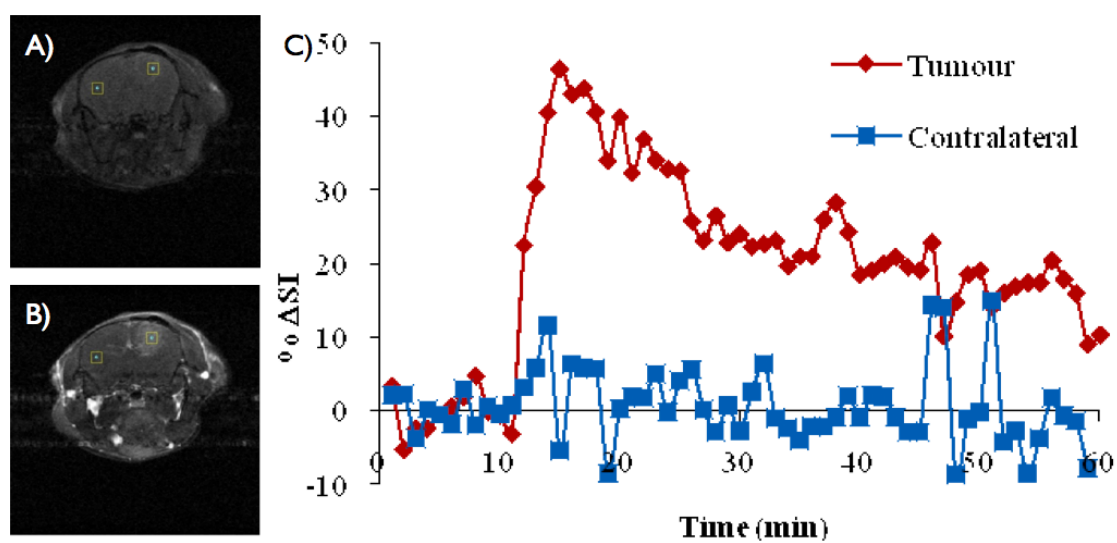

**Figure S9:**  $T_1$ -weighted images of a mouse brain before **A)** and immediately after **B)** the administration of Gadomer-17<sup>®</sup>. Right and left squares show the tumor and contralateral hemisphere ROI analyzed. **C)** Normalized  $\Delta SI$  in tumor (red) and in contralateral hemisphere (blue).

## References

- 1 Prasuhn Jr., D. E.; Yeh, R. M.; Obenaus, A.; Manchester, M.; Finn, M. G. *Chem. Commun.* **2007**, 1269.
- 2 Viguier, R. F. H.; Hulme, A. N. *J. Am. Chem. Soc.* **2006**, *128*, 11370.
- 3 Mosmann, T. *J. Immunol. Methods* **1983**, *65*, 55.
